# Supplementary material
Source: PubMed Central journal article supplement (PMC1388092)

Supplementary figure 1

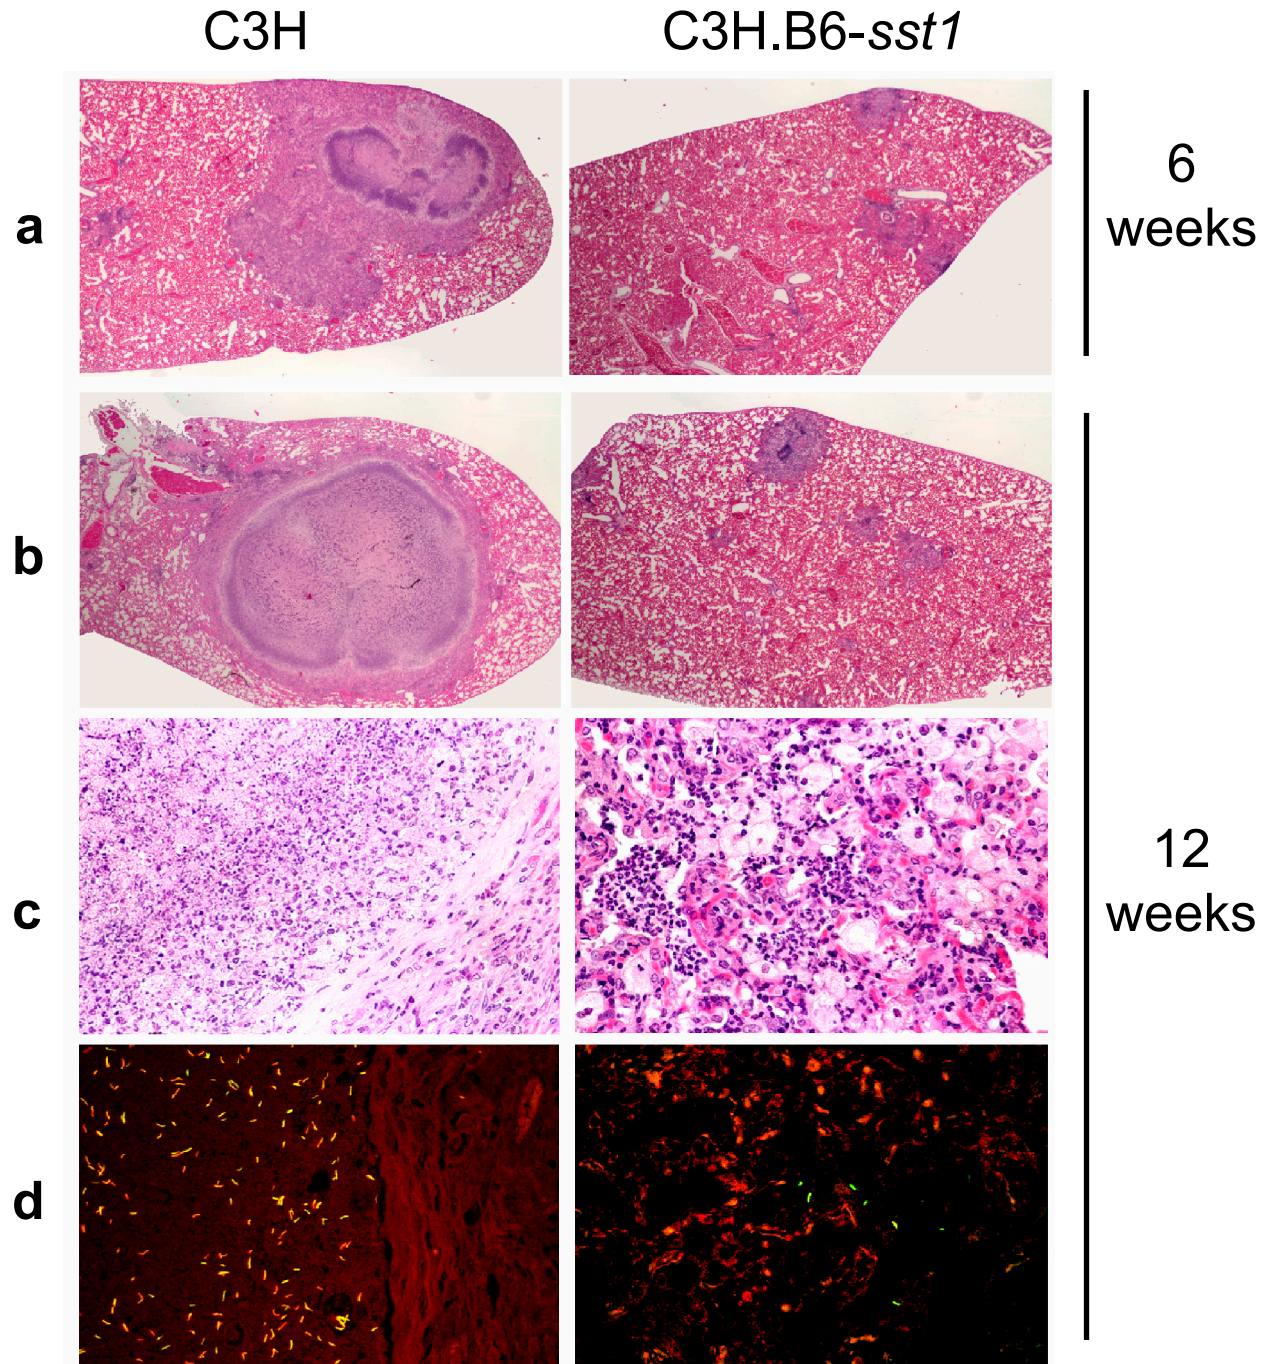

Supplement: NIHMS3836-supplement-5.pdf [file NIHMS3836-supplement-5.pdf]

## Supplementary figure 2

**a**

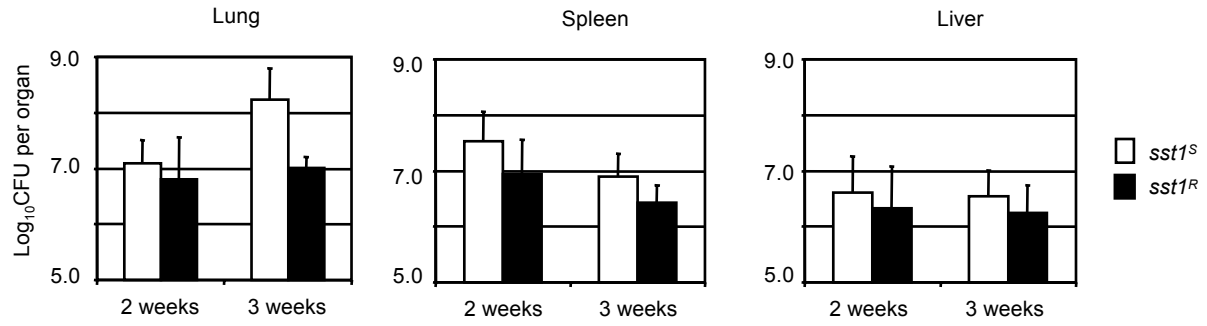

**b**

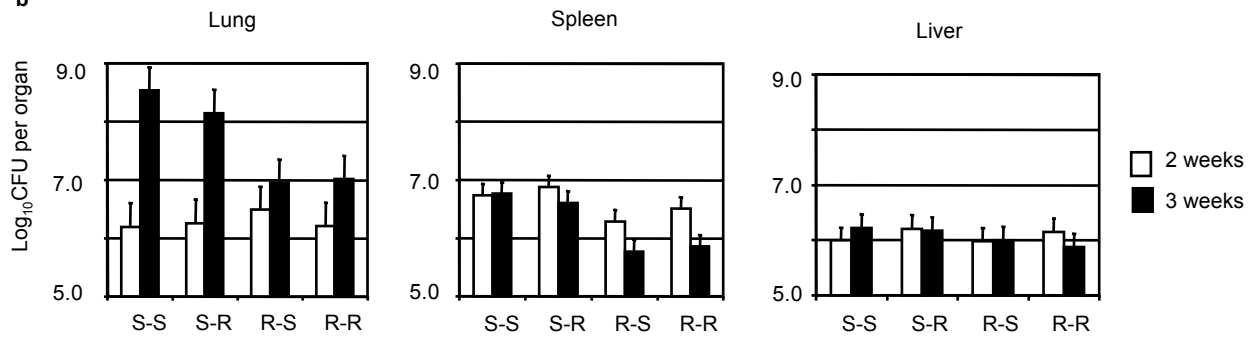

Supplement: NIHMS3836-supplement-6.pdf [file NIHMS3836-supplement-6.pdf]
